# Supplementary material for: Cotton Rats Alter Foraging in Response to an Invasive Ant
Source: PLoS One. 2016 Sep 21;11(9):e0163220. doi: 10.1371/journal.pone.0163220 (PMC5031446; doi:10.1371/journal.pone.0163220)
Supplement: S1 Table — (XLSX) [file pone.0163220.s001.xlsx]

## Sheet: Small Mammal Counts
Grid	RIFA	Peromyscus gossypinus	Sigmodon hispidus	Peromyscus polionotus
1	+	2	21	2
2	-	11	23	1
3	-	7	62	0
4	+	8	32	0
5	-	3	45	0
6	+	9	31	0
